# Supplementary material for: The Anti-Inflammatory Effect of Multi-Wavelength Light-Emitting Diode Irradiation Attenuates Dry Eye Symptoms in a Scopolamine-Induced Mouse Model of Dry Eye
Source: MDPI journal article supplement (doi:10.3390/ijms242417493), 2023-12-14
Supplement: s1 [file s1]

## **Supplementary file**

Supplementary file 1: Figure of fluorescent intensity analysis of pro-inflammatory cytokine markers

## Supplementary figures

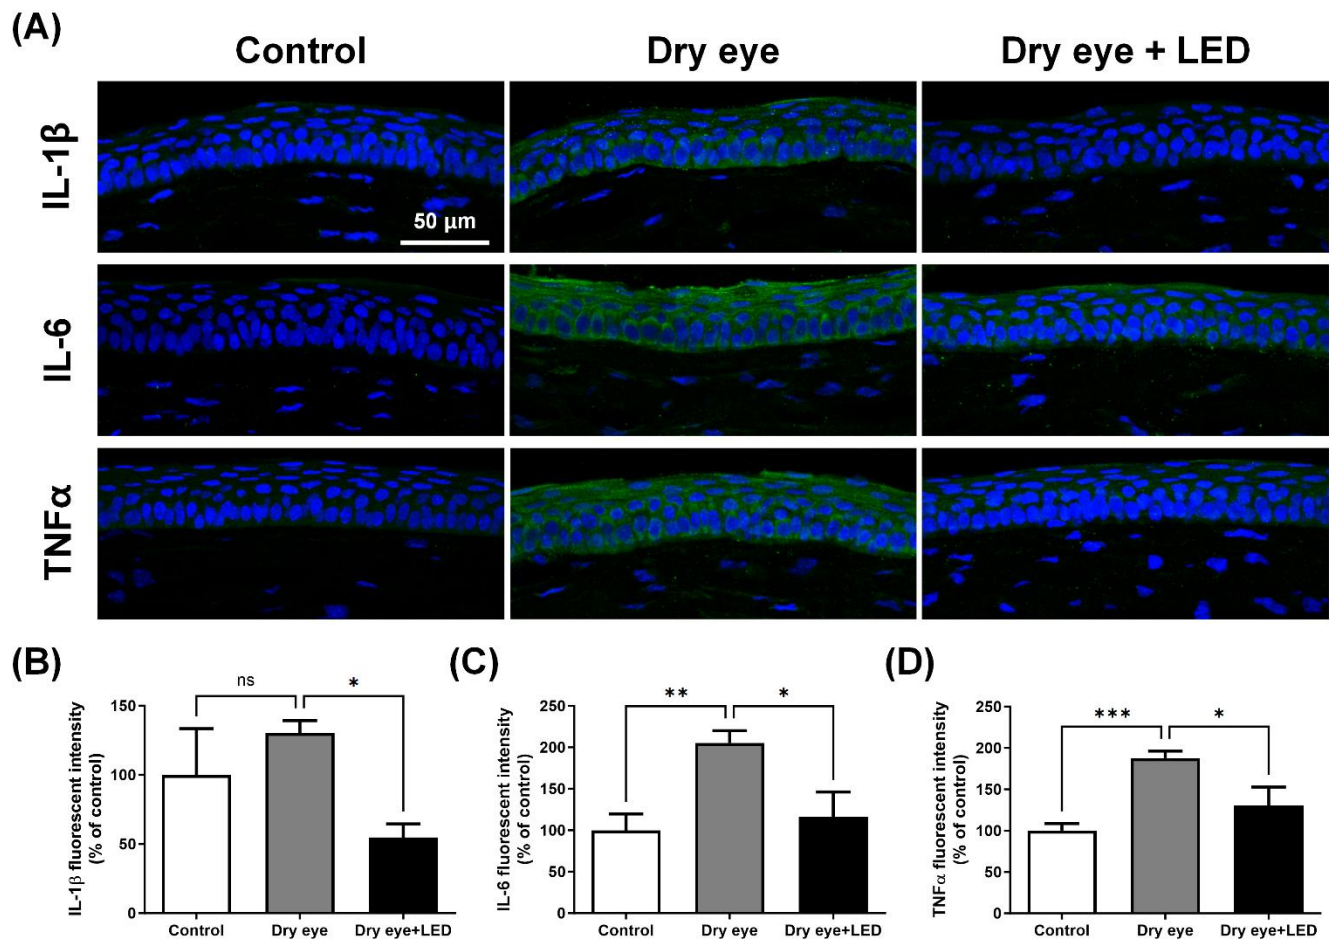

**Figure S1.** Multi-wavelength LED attenuated the expression of pro-inflammatory markers in the corneal epithelium of dry eye mice. (A) Representative images of immunostained IL-1 $\beta$ , IL-6 and TNF- $\alpha$  (green) showed the expression pattern of pro-inflammatory cytokines in the corneal epithelium. The scale bar indicates 50  $\mu$ m. (B-D) The fluorescent intensity of pro-inflammatory cytokines was quantified (IL-1 $\beta$ , IL-6 and TNF- $\alpha$ , respectively). This quantification revealed that the multi-wavelength LED significantly decreased the expression of pro-inflammatory markers in the corneal epithelium of dry eye. Data are expressed as the mean  $\pm$  SEM; \* $p$  < 0.05, \*\* $p$  < 0.01, \*\*\* $p$  < 0.001 relative to Dry eye group (one-way ANOVA with the Bonferroni post-hoc test).
